# Supplementary material for: Network resilience of mutualistic ecosystems and environmental changes: an empirical study
Source: R Soc Open Sci. 2018 Sep 12;5(9):180706. doi: 10.1098/rsos.180706 (PMC6170563; doi:10.1098/rsos.180706)
Supplement: Source code S1. An example R script for data analysis. [file rsos180706supp3.r]

#####################################################################
# Example R script for data analysis
# This script is for evaluating the contribution of each variable
# to plant network resilience in pollination networks.
#
# Contact:
# Kazuhiro Takemoto (takemoto@bio.kyutech.ac.jp)
#####################################################################

library(spdep)
library(MuMIn)
options(na.action = "na.fail")

# data for pollination networks
d <- read.csv("TableS1.csv")

# Normalization
d_s <- data.frame(scale(log(d[c("b_eff_plant","b_eff_animal","NoPlants","NoAnimals")])),d[c("Longitude","Latitude")],scale(sqrt(d["P_ann"])),scale(log(abs(d[c("T_velocity","P_velocity")]))),scale(d[c("Elevation","T_mean","T_seasonality","P_seasonality","Human_impact")]))

## OLS regression analysis #######################################
res1 <- lm(b_eff_plant~NoPlants+Elevation+T_mean+T_seasonality+P_ann+P_seasonality+Human_impact+T_velocity+P_velocity,data=d_s)

res1_models <- dredge(res1,rank="AICc")
res1_best <- get.models(res1_models, subset = 1)[1]
res1_ave <-model.avg(get.models(res1_models, cumsum(weight) <= .95))

# OLS full model
summary(res1)
# OLS best model
summary(res1_best[[1]])
# OLS averaged model
summary(res1_ave)


## Spatial analysis based on SEVM modeling approach ##############
set.seed(5)
long <- d_s$Longitude
lat <- d_s$Latitude
n_num <- length(d_s[[1]])
longlat <- cbind(long+rnorm(n_num)/1000,lat+rnorm(n_num)/1000)
longlat_knn <- knearneigh(longlat,k=2,longlat=T)
longlat_nb <- knn2nb(longlat_knn)
longlat_listw <- nb2listw(longlat_nb)

# Moran's I test for the OLS full model
lm.morantest.exact(res1,longlat_listw)
# Moran's I test for the OLS best model
lm.morantest.exact(res1_best[[1]],longlat_listw)

# A spatial eigenvector mapping (SEVM) modelling approach removing spatial autocorrelation in the model residuals
lagcol <- SpatialFiltering(b_eff_plant~1,~NoPlants+Elevation+T_mean+T_seasonality+P_ann+P_seasonality+Human_impact+T_velocity+P_velocity-1,data=d_s,style="W",nb=longlat_nb,ExactEV=T)

res1_corr <- lm(b_eff_plant~NoPlants+Elevation+T_mean+T_seasonality+P_ann+P_seasonality+Human_impact+T_velocity+P_velocity+fitted(lagcol), data=d_s)

res1_corr_models <- dredge(res1_corr,rank="AICc",fixed = "fitted(lagcol)")
res1_corr_best <- get.models(res1_corr_models, subset = 1)[1]
res1_corr_ave <- model.avg(get.models(res1_corr_models, cumsum(weight) <= .95))

# SEVM full model
summary(res1_corr)
# SEVM best model
summary(res1_corr_best[[1]])
# SEVM averaged model
summary(res1_corr_ave)

# Moran's I test for the SEVM full model
lm.morantest.exact(res1_corr,longlat_listw)
# Moran's I test for the SEVM best model
lm.morantest.exact(res1_corr_best[[1]],longlat_listw)
