# Supplementary material for: Network resilience of mutualistic ecosystems and environmental changes: an empirical study
Source: R Soc Open Sci. 2018 Sep 12;5(9):180706. doi: 10.1098/rsos.180706 (PMC6170563; doi:10.1098/rsos.180706)
Supplement: Table S1. List of pollination networks. [file rsos180706supp1.xlsx]

## Sheet: TableS1
Network_ID	Network_type	Reference	b_eff_plant	b_eff_animal	NoPlants	NoAnimals	NoLinks	Longitude	Latitude	Elevation	T_mean	T_seasonality	P_ann	P_seasonality	Human_impact	T_velocity	P_velocity
arroyo_I	binary	Arroyo, M. T. K., & R. B. Primack, & J. J. Armesto. (1982 Community studies in pollination ecology in the high temperate Andes of Central Chile. I. Pollination mechanisms and altitudinal variation., American Journal of Botany 69:82-97.	8.77419	10.9731	87	98	372	-70.27	-33.28	2400	-1	3979	462	86	10	3259.24	12817.4
arroyo_II	binary	Arroyo, M. T. K., & R. B. Primack, & J. J. Armesto. (1982繧ｷ. Community studies in pollination ecology in the high temperate Andes of Central Chile. I. Pollination mechanisms and altitudinal variation., American Journal of Botany 69:82-97.	7.40201	7.22111	43	62	199	-70.27	-33.28	2900	-1	3979	462	86	10	3259.24	12817.4
arroyo_III	binary	Arroyo, M. T. K., & R. B. Primack, & J. J. Armesto. (1982繧ｷ. Community studies in pollination ecology in the high temperate Andes of Central Chile. I. Pollination mechanisms and altitudinal variation., American Journal of Botany 69:82-97.	3.43956	8.49451	41	28	91	-70.27	-33.28	3400	-1	3979	462	86	10	3259.24	12817.4
clements_1923	binary	Clements, R. E., and F. L. Long. 1923, Experimental pollination. An outline of the ecology of flowers and insects. Washington, D.C., USA, Carnegie Institute of Washington.	27.4724	10.5038	96	275	923	-105.04	38.84	4301.5	-6	7408	671	38	40	13698.5	3125.19
dupont_et_al_2003	binary	Dupont YL, Hansen DM and Olesen JM (2003) Structure of a plant-flower-visitor network in the high-altitude sub-alpine desert of Tenerife, Canary Islands. Ecography 26:301-310	11.6226	3.84906	11	38	106	-16.6	28.27	2457.2	95	4704	498	89	50	992.202	26481.5
hocking_1968	binary	Hocking, B. 1968. Insect-flower associations in the high Arctic with special reference to nectar. Oikos 19:359-388.	20.4022	3.3913	29	86	184	-70.42	81.83	189.8	-175	13268	109	44	0	137210	17591.4
kato_et_al_1990	binary	Kato, M., T. Makutani, T. Inoue, and T. Itino. 1990. Insect-flower relationship in the primary beech forest of Ashu, Kyoto: an overview of the flowering phenology and seasonal pattern of insect visits. Contr. Biol. Lab. Kyoto Univ. 27:309-375.	56.2255	4.81592	91	679	1206	135.7	35.33	617.3	120	8314	1933	31	28	75623.2	168935
kevan_1970	binary	Kevan, P. G. 1970. High arctic insect-flower visitor relations: the inter-relationships of arthropods and flowers at Lake Hazen, Ellesmere Island, Northwest Territories, Canada. Ph.D. thesis thesis, University of Alberta.	29.9419	4.67742	32	115	310	-71.24	81.75	256	-174	13343	100	48	0	101606	6379.3
medan_et_al_2002_LD	binary	Medan, D., N. H. Montaldo, M. Devoto, A. Mantese, V. Vasellati, and N. H. Bartoloni. 2002. Plant-pollinator relationships at two altitudes in the Andes of Mendoza, Argentina. Arctic Antarctic and Alpine Research 34:233-241.	9.43374	2.68675	21	45	83	-69.7	-34.16	3289	22	4365	513	68	10	6436.74	37135
medan_et_al_2002_RB	binary	Medan, D., N. H. Montaldo, M. Devoto, A. Mantese, V. Vasellati, and N. H. Bartoloni. 2002. Plant-pollinator relationships at two altitudes in the Andes of Mendoza, Argentina. Arctic Antarctic and Alpine Research 34:233-241.	17.976	2.712	23	72	125	-69.3	-32.81	1694.9	106	4568	210	23	50	9562.06	6160.4
olesen_aigrettes	binary	Olesen, J. M., L. I. Eskildsen, and S. Venkatasamy. 2002. Invasion of pollination networks on oceanic islands: importance of invader complexes and endemic super generalists. Diversity and Distributions 8:181-192.	4.5	6.76923	14	13	52	-31.22	39.47	837.6	147	3152	1578	36	6	38144.8	564.146
olesen_flores	binary	Olesen, J. M., L. I. Eskildsen, and S. Venkatasamy. 2002. Invasion of pollination networks on oceanic islands: importance of invader complexes and endemic super generalists. Diversity and Distributions 8:181-192.	4.13333	3.46667	10	12	30	-31.22	39.47	837.6	147	3152	1578	36	6	38144.8	564.146
P1	binary	Elberling H. & Olesen J.M., unpublished data. Arctic tundra, Greenland.	18.5011	10.6689	31	75	453	-20.5	74.5	2388	-112	9285	256	23	6	35759.5	17728.9
P11	binary	J.M. Olesen, unpublished data. Bog, Hestehaven, Denmark.	9.36111	2.75	10	40	72	10.04	56.12	39	74	6174	644	22	65	836078	19315.9
P12	binary	J.M. Olesen, unpublished data. Forest, Hestehaven, Denmark.	12.1646	2.49367	8	42	79	10.04	56.12	39	74	6174	644	22	65	836078	19315.9
P13	binary	J.M. Olesen, unpublished data. Wasteground, Hestehaven, Denmark.	13.56	5.872	28	82	250	10.04	56.12	39	74	6174	644	22	65	836078	19315.9
P15	binary	Primack R.B. (1983). Insect pollination in the New Zealand mountain flora. New Zealand J. Bot., 21, 317-333.	8.18333	3.23333	18	60	120	171.58	-42.98	887.8	62	3790	3193	14	28	26683.3	9368.81
P16	binary	Primack R.B. (1983). Insect pollination in the New Zealand mountain flora. New Zealand J. Bot., 21, 317-333.	17.1658	5.40107	41	139	374	171.76	-43.04	562	87	3657	2503	14	28	35920.2	1963.17
P17	binary	Primack R.B. (1983). Insect pollination in the New Zealand mountain flora. New Zealand J. Bot., 21, 317-333.	13.1561	8.51445	49	118	346	171.98	-43.35	350	103	3687	966	9	43	70722.4	5994.31
P18	binary	Schemske, D., Willson, M.F., Melampy, M., Miller, L., Verner, L., Schemske, K. & Best, L. (1978). Flowering ecology of some spring woodland herbs. Ecology 59, 351-366.	16.8462	2.78462	7	33	65	-88.2	40.1	223.4	108	9814	966	24	96	1.31551e+06	130813
P2	binary	Elberling H. & Olesen J.M. (1999). The structure of a high latitude plantflower visitor system: the dominance of flies. Ecography, 22, 314-323.	16.1405	3.98347	24	118	242	18.5	68.35	1014.4	-35	7323	639	29	7	75819.1	2600.58
santos_et_al_2010	binary	Santos, G. M M, C. M. L. Aguiar & M. A. R. Mello (2010) Flower-visiting guild associated with the Caatinga flora: trophic interaction networks formed by social bees and social wasps with plants. Apidologie 41: 466-475.	7.04233	15.5926	50	25	189	-39.77	-12.7	239	231	1440	538	50	45	74191.3	95901
M_PL_012	binary	Olesen JM, unpublished	12.2414	5.95172	29	55	145	-17.2489	28.1278	1177.79	155	3120	442	85	34	1747.58	27301.7
M_PL_015	binary	Petanidou, T. (1991). Pollination ecology in a phryganic ecosystem. Unp. PhD. Thesis, Aristotelian University, Thessaloniki.	37.8906	14.3522	131	666	2933	23.635	38.0145	121.137	174	6557	434	62	65	129003	74761.3
M_PL_018	binary	Olesen JM, unpublished	14.342	7.87206	39	105	383	9.97365	56.2387	83.4875	73	6176	662	21	60	838309	15760.6
M_PL_031	binary	Ramirez, N. (1989). Biolog_a de polinizaci_n en una comunidad arbustiva tropical de la alta Guyana Venezolana. Biotropica 21, 319-330.	4.87179	6.75641	48	49	156	-61.7167	5.58333	1477.08	204	380	2404	53	6	12000.9	387.079
M_PL_034	binary	Smith-Ram_rez C., P. Martinez, M. Nu_ez, C. Gonz_lez and J. J. Armesto (2005) Diversity, flower visitation frequency and generalism of pollinators in temperate rain forests of Chilo_ Island,Chile. Botanical Journal of the Linnean Society, 2005, 147, 399_416.	24.6603	5.91026	26	128	312	-73.5833	-42	82.6208	104	2331	2316	42	28	137971	35316.8
M_PL_037	binary	Montero AC (2005).The Ecology of Three Pollination Networks. MSc thesis (Univ of Aarhus, Aarhus, Denmark).	9.36111	2.75	10	40	72	9.97365	56.2487	78.1606	73	6176	662	21	60	838309	15760.6
M_PL_038	binary	Montero AC (2005).The Ecology of Three Pollination Networks. MSc thesis (Univ of Aarhus, Aarhus, Denmark).	12.1646	2.49367	8	42	79	9.99365	56.2387	70.2778	73	6176	662	21	65	838309	15760.6
M_PL_039	binary	Stald L (2003). Struktur og dynamik i rum og tid af et best_vningsnetv_rk p_ Tenerife, De Kanariske _er. Msc thesis (Univ of Aarhus, Aarhus, Denmark).	10.0698	5.34108	17	51	129	-16.6056	28.2686	2483.85	95	4704	498	89	50	992.202	26481.5
M_PL_043	binary	Montero AC (2005).The Ecology of Three Pollination Networks. MSc thesis (Univ of Aarhus, Aarhus, Denmark).	13.56	5.872	28	82	250	9.95365	56.2387	81.4366	72	6171	670	21	60	2.25756e+06	19606.8
M_PL_047	binary	Dupont & Olesen(2009). J. Animal Ecology, 78:346-353.	44.1529	4.44	19	186	425	9.26667	56.0667	75	73	5903	778	24	32	2.2852e+06	21496.2
M_PL_048	binary	Dupont & Olesen(2009). J. Animal Ecology, 78:346-353.	45.4024	5.83756	30	236	671	9.1	56.1	54.1644	75	5837	796	24	46	1.12777e+06	22627.6
M_PL_050	binary	Stald, L., Valido, A. & Olesen, J. M. 2003. Struktur og dynamik i rum og tid at et best_vningsnetv_rk p_ Tenerife, De Kanariske _er. MSc-thesis, Univ. of Aarhus, Denmark	9.60465	3.95349	14	35	86	-16.6056	28.2686	2483.85	95	4704	498	89	50	992.202	26481.5
M_PL_052	binary	Witt P (1998) BSc thesis. Univ of Aarhus, Aarhus, Denmark.	9.71739	4.32609	15	39	92	-50.55	66.9667	138.674	-51	9978	262	34	6	174929	42171.2
M_PL_053	binary	Yamazaki, K. & Kato, M. 2003. Flowering phenology and anthophilous insect community in a grassland ecosystem at Mt. Yufu, Western Japan. Contributions from the Biological Laboratory, Kyoto University 29: 255-318.	13.9372	4.6163	99	294	589	131.5	33.4	501.621	143	7630	1891	56	39	42612.9	32440.8
vaz_ag_matr_f	ex_weighted	V_zquez, D. P. 2002. Interactions among Introduced Ungulates, Plants, and Pollinators: A Field Study in the Temperate Forest of the Southern Andes. Doctoral Dissertation thesis, University of Tennessee, Knoxville, Tennessee, USA.	11.093	1.88372	10	29	43	-71.51	-41.1	957.8	71	4089	1103	55	43	7696.85	3722.85
vaz_cl_matr_f	ex_weighted	V_zquez, D. P. 2002. Interactions among Introduced Ungulates, Plants, and Pollinators: A Field Study in the Temperate Forest of the Southern Andes. Doctoral Dissertation thesis, University of Tennessee, Knoxville, Tennessee, USA.	8.86667	1.84444	9	33	45	-71.54	-41.07	867.3	84	4118	1210	57	28	29107.1	5030.51
vaz_ll_matr_f	ex_weighted	V_zquez, D. P. 2002. Interactions among Introduced Ungulates, Plants, and Pollinators: A Field Study in the Temperate Forest of the Southern Andes. Doctoral Dissertation thesis, University of Tennessee, Knoxville, Tennessee, USA.	11.2381	1.95238	10	29	42	-71.54	-41.05	777	84	4118	1210	57	28	29107.1	5030.51
vaz_mh_matr_f	ex_weighted	V_zquez, D. P. 2002. Interactions among Introduced Ungulates, Plants, and Pollinators: A Field Study in the Temperate Forest of the Southern Andes. Doctoral Dissertation thesis, University of Tennessee, Knoxville, Tennessee, USA.	8.61111	1.83333	8	26	36	-71.49	-41.32	956.8	54	4127	976	54	28	8116.57	2539.67
vaz_mnh_matr_f	ex_weighted	V_zquez, D. P. 2002. Interactions among Introduced Ungulates, Plants, and Pollinators: A Field Study in the Temperate Forest of the Southern Andes. Doctoral Dissertation thesis, University of Tennessee, Knoxville, Tennessee, USA.	12.2157	1.98039	8	35	51	-71.49	-41.32	956.8	54	4127	976	54	28	8116.57	2539.67
vaz_qh_matr_f	ex_weighted	V_zquez, D. P. 2002. Interactions among Introduced Ungulates, Plants, and Pollinators: A Field Study in the Temperate Forest of the Southern Andes. Doctoral Dissertation thesis, University of Tennessee, Knoxville, Tennessee, USA.	8.44681	2.82979	8	27	47	-71.61	-40.84	852.2	86	4045	1352	58	10	315748	5069.83
vaz_qnh_matr_f	ex_weighted	V_zquez, D. P. 2002. Interactions among Introduced Ungulates, Plants, and Pollinators: A Field Study in the Temperate Forest of the Southern Andes. Doctoral Dissertation thesis, University of Tennessee, Knoxville, Tennessee, USA.	10.1613	1.51613	7	24	31	-71.61	-40.84	852.2	86	4045	1352	58	10	315748	5069.83
vaz_s_matr_f	ex_weighted	V_zquez, D. P. 2002. Interactions among Introduced Ungulates, Plants, and Pollinators: A Field Study in the Temperate Forest of the Southern Andes. Doctoral Dissertation thesis, University of Tennessee, Knoxville, Tennessee, USA.	9.51282	1.82051	9	27	39	-71.51	-41.08	912.2	84	4118	1210	57	43	29107.1	5030.51
bartomeus_et_al_2008	weighted	Bartomeus, I., Vil_, M. & Santamaria, L., 2008. Contrasting effects of invasive plants in plant-pollinator networks. Oecologia 155: 761-770.	15.947	8.08411	33	83	321	1.47	41.82	685.4	127	5730	692	25	21	27654.7	23105
bezerra_et_al_2009	weighted	Bezerra, E. L. S, I. C. Machado & M. A. R. Mello (2009). Pollination networks of oil-flowers: a tiny world within the smallest of all worlds. Journal of Animal Ecology 78: 1096-1101.	6.83099	9.05634	13	13	71	-40	-8.5	459.5	244	1450	517	83	28	279558	12830.8
inouye_1988	weighted	Inouye, D. W., and G. H. Pyke. 1988. Pollination biology in the Snowy Mountains of Australia: comparisons with montane Colorado, USA. Australian Journal of Ecology 13:191-210.	11.2278	7.24199	42	91	281	148.33	-36.07	1437	78	4955	1649	31	8	16618	19678.4
kaiser_bunbury_2009_ctl	weighted	Kaiser-Bunbury, C. N., Memmott J. & M_ller C. B., 2009. Community structure of pollination webs of Mauritian heathland habitats. Perspectives in Plant Ecology, Evolution and Systematics 11: 241_254	18.3483	14.8127	58	100	534	57.45	-20.44	674.6	205	2199	1849	50	34	5958.49	50738.4
kaiser_bunbury_2009_rst	weighted	Kaiser-Bunbury, C. N., Memmott J. & M_ller C. B., 2009. Community structure of pollination webs of Mauritian heathland habitats. Perspectives in Plant Ecology, Evolution and Systematics 11: 241_254	18.2581	17.621	73	135	744	57.45	-20.44	674.6	205	2199	1849	50	34	5958.49	50738.4
memmott_1999	weighted	Memmott, J. 1999. The structure of a plant-pollinator food web. Ecology Letters 2:276-280.	21.7692	7.43478	25	79	299	-2.59	51.46	26	96	4618	848	17	100	1.64019e+06	977.786
motten_1982	weighted	Motten, A. F. 1982. Pollination Ecology of the Spring Wildflower Community in the Deciduous Forests of Piedmont North Carolina. Doctoral Dissertation thesis, Duke University, Duhram, North Carolina, USA.	17.6713	4.63636	13	44	143	-78.91	35.97	90.4	149	7634	1145	12	65	765707	13207.1
ollerton_et_al_2003	weighted	Ollerton, J., S. D. Johnson, L. Cranmer, and S. Kellie. 2003. The pollination ecology of an assemblage of grassland asclepiads in South Africa. Annals of Botany 92:807-834.	19	2.84466	9	56	103	30.42	-29.58	665.9	178	3028	887	63	100	16327.2	23150.5
P4	weighted	Inoue, T., Kato, M., Kakutani, T., Suka, T., & Itino, T. (1990). Insect flower relationship in the temperate deciduous forest of Kibune, Kyoto: An overview of the flowering phenology and the seasonal pattern of insect visits. Contrib. Biol. Lab.., Kyoto Univ. 27, 377-463.	49.3904	7.4864	112	839	1875	135.87	35.17	330.7	114	8333	1929	37	32	33826.4	57825.1
P6	weighted	Kakutani, T., Inoue, T., Kato, M. & Ichihashi, H. (1990). Insect flower relationship in the campus of Kyoto University, Kyoto: An overview of the flowering phenology and the seasonal pattern of insect visits. Contrib. Biol. Lab.., Kyoto Univ. 27, 465-521.	21.237	6.83333	112	314	768	135.78	35.03	61.8	153	8188	1725	42	84	52818.9	197434
P7	weighted	Kato M. & Miura R. (1996). Flowering phenology and anthophilous insect community at a threatened natural lowland marsh at Nakaikemi in Tsuruga, Japan. Contrib. Biol. Lab., Kyoto Univ., 29, 1-48.	14.9163	4.86512	64	187	430	136.08	35.65	22.9	147	8028	2306	23	71	74055.2	110827
P9	weighted	Kato M., Matsumoto M. & Kato T. (1993). Flowering phenology and anthophilous insect community in the cool-temperate subalpine forests and meadows at Mt. Kushigata in the Central part of Japan. Contrib. Biol. Lab., Kyoto Univ., 28, 119-172.	20.6092	6.81272	90	354	865	138.38	35.58	1476.3	92	8222	1708	48	21	7214.58	11522.6
small_1976	weighted	Small, E. 1976. Insect pollinators of the Mer Bleue peat bog of Ottawa. Canadian Field Naturalist 90:22-28.	13.0567	5.49645	13	34	141	-75.5	45.4	70	60	10923	883	14	60	939881	946729
vaz_all_site_pooled_matr_f	weighted	V_zquez, D. P. 2002. Interactions among Introduced Ungulates, Plants, and Pollinators: A Field Study in the Temperate Forest of the Southern Andes. Doctoral Dissertation thesis, University of Tennessee, Knoxville, Tennessee, USA.	26.2927	3.04878	14	90	164	-71.48	-41.07	870.7	85	4164	1148	56	48	64682.8	6626.51
M_PL_006	weighted	Dicks, LV, Corbet, SA and Pywell, RF 2002. Compartmentalization in plant_insect flower visitor webs. J. Anim. Ecol. 71: 32_43.	24.5753	4.32877	17	61	146	1.57553	52.7624	2.19292	103	4786	618	15	40	934690	47123.7
M_PL_007	weighted	Dicks, LV, Corbet, SA and Pywell, RF 2002. Compartmentalization in plant_insect flower visitor webs. J. Anim. Ecol. 71: 32_43.	11.0471	3.98823	16	36	85	1.09787	52.4132	39	97	4860	603	13	40	1.7139e+06	26260.8
M_PL_040	weighted	Ingversen TT (2006). Plant_pollinator interactions on Jamaica and Dominica: The centrality, asymmetry and modularity of networks. Msc thesis (Univ of Aarhus, Aarhus, Denmark).	7.91228	4.24561	29	43	114	-77.6453	18.3539	133.699	246	952	1674	33	21	7386.75	8889.62
junker2013	weighted	Junker, R. R., Bl_thgen, N., Brehm, T., Binkenstein, J., Paulus, J., Martin Schaefer, H., Stang, M. (2013), Specialization on traits as basis for the niche-breadth of flower visitors and as structuring mechanism of ecological networks. Functional Ecology, 27: 329_341.	18.958	7.34266	56	257	572	9.96861	49.7794	274.4	92	6659	625	19	93	187759	511.073
