# Supplementary material for: Network resilience of mutualistic ecosystems and environmental changes: an empirical study
Source: R Soc Open Sci. 2018 Sep 12;5(9):180706. doi: 10.1098/rsos.180706 (PMC6170563; doi:10.1098/rsos.180706)
Supplement: Table S2. List of seed-dispersal networks. [file rsos180706supp2.xlsx]

## Sheet: TableS2
Network_ID	Network_type	Reference	b_eff_plant	b_eff_animal	NoPlants	NoAnimals	NoLinks	Longitude	Latitude	Elevation	T_mean	T_seasonality	P_ann	P_seasonality	Human_impact	T_velocity	P_velocity
M_SD_030	binary	Data unpublished, however see Jordano 1993	3.18182	3	5	4	11	-2.84199	37.3805	2245.47	98	6579	695	39	40	5087.03	34708.5
M_SD_028	binary	Data unpublished, however see Jordano 1993	3.84615	6	8	5	26	-2.75	38.0833	1365.99	103	6671	646	36	21	4924.03	29692
M_SD_027	binary	Data unpublished, however see Jordano 1993	3.12903	8.29032	12	4	31	-2.86635	37.9275	1621.74	108	6691	633	38	28	6491.09	43409.5
M_SD_026	binary	Data unpublished, however see Jordano 1993	2.33333	2.33333	3	3	6	-3.38573	37.108	2189.95	79	6612	860	41	65	2155.19	20619.5
M_SD_025	binary	Sorensen 1981	3.72727	4.36364	7	6	22	-1.33333	51.7667	135.964	97	4649	627	14	46	603643	5902.1
M_SD_022	binary	Silva, W.R., P. De Marco, E. Hasui, and V.S.M. Gomes (2002) Patterns of fruit-frugivores interactions in two Atlantic Forest bird communities of South-eastern Brazil: implications for conservation. Pp. 423-435. In: D.J. Levey, W.R. Silva and M. Galetti (eds.) Seed dispersal and frugivory: ecology, evolution and conservation. Wallinford: CAB International.	12.5897	23.0963	207	110	1121	-48.4069	-24.2653	894.076	175	2914	1400	45	15	82007	30524.8
M_SD_021	binary	P. Jordano, unpubl.	11.9612	6.96899	18	28	129	-2.79272	37.9409	1567.65	104	6706	647	37	28	6497.49	38037.6
M_SD_019	binary	Wheelwright, N.T., Haber, W.A., Murray, K.G., Guindon, C. 1984. Tropical fruit-eating birds and their food plants: a survey of a Costa Rican lower montane forest. Biotropica, 16: 173-192.	8.88889	34.9339	169	40	666	-84.8	10.3	1552.9	188	698	2956	50	21	4119.92	12012.4
M_SD_018	binary	Mack, AL and Wright, DD. (1996) Notes on occurrence and feeding of birds at Crater Mountain Biological Research Station, Papua New Guinea. Emu 96: 89-101.	3.90909	3.57576	29	32	66	145.093	-6.72333	933.4	210	597	2978	20	15	12122.4	5341.79
M_SD_017	binary	Tutin, C.E.G., Ham, R.M., White, L.J.T., Harrison, M.J.S. 1997. The primate community of the Lop鬩帙瑚ｭ上おReserve, Gabon: diets, responses to fruit scarcity, and effects on biomass. American Journal of Primatology, 42: 1-24.	4.97222	9.58333	16	8	72	11.5833	0.166667	340.066	247	942	1679	68	1	61232.5	83377.3
M_SD_016	binary	Lambert F. (1989). Fig-eating by birds in a Malaysian lowland rain forest. J. Trop. Ecol., 5, 401-412.	23.944	13.644	24	61	500	102.283	3.71667	74.7403	260	500	2136	28	32	8141.05	49225.1
M_SD_015	binary	Kantak, G.E. 1979. Observations on some fruit-eating birds in Mexico. Auk, 96: 183-186.	18.9535	3.55814	5	27	86	-89.4862	18.507	284.143	246	2230	1130	58	21	285650	280328
M_SD_014	binary	Jordano P. (1985) El ciclo anual de los paseriformes frug鬯ｩ蟶呵ｭ∵ｺｯ繝ｲros en el matorral mediterr鬩帙瑚ｬ玲脈l de los paseriformes frug鬩帙瑚ｭ∵ｺｯ繝ｲros en el matorral mediterr鬩帙瑚ｫ｡繧ｪeo del sur de Espa鬩帙瑚ｭ上お繧ｷ譚ｪ: importancia de su invernada y variaciones interanuales. Ardeola, 32, 69-94.	9.61157	9.77686	16	17	121	-6.32404	37.1804	15.8868	181	5484	541	63	40	133026	460107
M_SD_013	binary	Hammann, A. & Curio, B. (1999) Interactions among frugivores and fleshy fruit trees in a Philippine submontane rainforest.	8.03553	12.0558	36	19	197	123.183	10.6833	934.142	229	554	2431	43	28	3637.74	26056.3
M_SD_011	binary	Snow B.K. & Snow D.W. (1988) Birds and berries, Calton, England.	6.10638	4.23404	11	14	47	-1.85137	53.0569	315.34	86	4690	982	14	21	882404	11821.6
M_SD_007	binary	Crome, F.H.J. 1975. The ecology of fruit pigeons in tropical Northern Queensland. Australian Journal of Wildlife Research, 2: 155-185.	2.52448	37.1818	72	7	143	146.083	-17.85	327.811	236	2718	3142	75	34	72253.5	44068.5
M_SD_023	weighted	Noma, N. 1997. Annual fluctuations of sapfruits production and synchronization within and inter species in a warm temperate forest on Yakushima Island, Japan. Tropics, 6: 441-449.	3.73684	7.63158	15	8	38	130.5	30.3333	1744.74	112	5733	3600	44	28	39849.5	66065.9
M_SD_020	weighted	P. Jordano, unpubl.	12.32	7.98667	25	33	150	-2.86635	37.9275	1621.74	108	6691	633	38	28	6491.09	43409.5
M_SD_012	weighted	Galetti, M., Pizo, M.A. 1996. Fruit eating birds in a forest fragment in southeastern Brazil. Ararajuba, Revista Brasileira de Ornitologia, 4: 71-79.	7.20548	8.79452	35	29	146	-47.1	-22.8167	598.987	197	2402	1311	65	53	188038	91656
M_SD_010	weighted	Snow, B.K., Snow, D.W. 1971. The feeding ecology of tanagers and honeycreepers in Trinidad. Auk, 88: 291-322.	6.78632	19.4359	50	14	234	-61.3	10.7167	356.479	243	626	2464	42	34	9933.64	1964.44
M_SD_009	weighted	Galetti, M., Pizo, M.A. 1996. Fruit eating birds in a forest fragment in southeastern Brazil. Ararajuba, Revista Brasileira de Ornitologia, 4: 71-79.	6.52632	3.63158	7	18	38	-47.1	-22.8167	598.987	197	2402	1311	65	53	188038	91656
M_SD_008	weighted	Frost, P.G.H. 1980. Fruit-frugivore interactions in a South African coastal dune forest. Pages 1179-1184 in: R. Noring (ed.). Acta XVII Congresus Internationalis Ornithologici, Deutsches Ornithologische Gessenshaft, Berlin.	7.52727	11.8182	16	10	110	31.75	-28.95	55.3736	216	2783	1083	37	71	115737	9109.36
M_SD_006	weighted	Carlo et al. (2003) Avian fruit preferences across a Puerto Rican forested landscape: pattern consistency and implications for seed removal. Oecologia 134: 119-131	4.13725	6.05882	21	15	51	-66.5586	18.3083	340.928	235	1247	1955	36	50	8068.93	34189.9
M_SD_005	weighted	Carlo et al. (2003) Avian fruit preferences across a Puerto Rican forested landscape: pattern consistency and implications for seed removal. Oecologia 134: 119-131	3.2449	6.71429	25	13	49	-66.5919	18.1725	1313.96	209	1269	2392	45	50	9844.71	30222.1
M_SD_004	weighted	Carlo et al. (2003) Avian fruit preferences across a Puerto Rican forested landscape: pattern consistency and implications for seed removal. Oecologia 134: 119-131	4.83158	12.0105	34	20	95	-66.5356	18.2583	752.212	231	1246	1943	39	37	6310	19008.2
M_SD_003	weighted	Carlo et al. (2003) Avian fruit preferences across a Puerto Rican forested landscape: pattern consistency and implications for seed removal. Oecologia 134: 119-131	4.70588	8.29412	25	16	68	-66.7819	18.2969	299.222	233	1202	2232	38	56	13053.9	25253.6
M_SD_002	weighted	Beehler, B. 1983. Frugivory and polygamy in birds of paradise. Auk, 100: 1-12.	5.47059	15.7899	31	9	119	146.7	-7.26667	1071.17	223	543	1759	26	32	13131.1	5039.82
M_SD_001	weighted	Baird, J.W. 1980. The selection and use of fruit by birds in an eastern forest. Wilson Bulletin 92: 63-73.	8.72	3.68	7	21	50	-74.6667	40.3319	33.2907	114	8650	1155	14	65	436247	109728
Schleuning_et_al_2011_primary	weighted	Matthias Schleuning, Nico Bl_thgen, Martina Fl_rchinger, Julius Braun, H. Martin Schaefer, Katrin B_hning-Gaese, (2011). Specialization and interaction strength in a tropical plant-frugivore network differ among forest strata. Ecology, 92(1): 26-36.	21.4452	7.76325	19	71	283	34.9	0.4	1546.2	199	708	1808	41	21	39701.5	22390.3
Schleuning_et_al_2011_secondary	weighted	Matthias Schleuning, Nico Bl_thgen, Martina Fl_rchinger, Julius Braun, H. Martin Schaefer, Katrin B_hning-Gaese, (2011). Specialization and interaction strength in a tropical plant-frugivore network differ among forest strata. Ecology, 92(1): 26-36.	15.8971	4.52941	14	57	136	34.9	0.4	1546.2	199	708	1808	41	21	39701.5	22390.3
